# Supplementary material
Source: PubMed Central journal article supplement (PMC5671370)
Supplement: NIHMS876403-supplement-supplement_1.pdf [file NIHMS876403-supplement-supplement_1.pdf]

## TABLES AND FIGURE CAPTIONS

### SUPPLEMENTARY INFORMATION

**Supplementary Table 1. Relationships between food intake control and NP recall**

| Memory Outcome         | Model                         | $\beta$                  | $\Delta R^2$ | $\Delta R^2$ p value |
|------------------------|-------------------------------|--------------------------|--------------|----------------------|
| Recall NP <sup>a</sup> | Base Model                    |                          | 0.07         | 0.43                 |
|                        | + Strategic Dieting           | -0.33                    | 0.00         | 0.80                 |
|                        | + Attitude to Self-Regulation | 0.73                     | 0.00         | 0.64                 |
|                        | + Avoidance of Fat.           | <b>4.18<sup>†</sup></b>  | 0.09         | <b>0.004</b>         |
|                        | + Habitual Susceptibility     | <b>-2.66</b>             | 0.04         | <b>0.07</b>          |
|                        | + Emotional Susceptibility    | <b>-3.61<sup>†</sup></b> | 0.07         | <b>0.01</b>          |
|                        | + Situational Susceptibility  | -0.95                    | 0.01         | 0.51                 |
|                        | + Flexible Control            | 0.40                     | 0.00         | 0.71                 |
|                        | + Rigid Control               | 1.15                     | 0.01         | 0.27                 |
|                        | + Cognitive Restraint         | 0.56                     | 0.00         | 0.55                 |
|                        | + Uncontrolled Eating         | <b>-1.55*</b>            | 0.06         | <b>0.02</b>          |
|                        | + Emotional Eating            | <b>-3.61<sup>†</sup></b> | 0.07         | <b>0.01</b>          |

Hierarchical linear regression was used to examine the change in  $R^2$  with the addition of each eating style. The base model included sex, age, reported energy intake as a percentage of resting energy expenditure, percent body fat from the air displacement plethysmography, percent calories from added sugars, and percent calories from saturated fatty acids.  $R^2$  is reported for the base model and the change in  $R^2$  is reported from each univariate analysis in response to adding each eating style to the base model.

<sup>a</sup>The percent of words recalled from the control condition, a secondary measure of episodic memory.

## TABLES AND FIGURE CAPTIONS

$\beta$ , unstandardized regression coefficient; NP, control items that received no retrieval practice.

\* $p < 0.05$ , † $p < 0.01$

**Supplementary Table 2. Word categories and exemplars for RP Paradigm**

| <b>Category</b> | <b>Exemplars</b>                                    |
|-----------------|-----------------------------------------------------|
| Weapon          | rifle, club, sword, cannon, spear, pistol           |
| Fish            | goldfish, perch, trout, minnow, tuna, catfish       |
| Drink           | brandy, rum, vodka, whiskey, bourbon, gin           |
| Bird            | hawk, eagle, pigeon, sparrow, wren, robin           |
| Tool            | drill, level, chisel, nails, wrench, ruler          |
| Fruit           | cherry, tangerine, banana, lemon, pineapple, orange |
| Metal           | zinc, tin, aluminum, lead, steel, silver            |
| Insect          | ant, beetle, termite, roach, grasshopper, hornet    |

RP, retrieval practice.
